# Supplementary material
Source: publisher site journal article supplement (https://static.cambridge.org/content/id/urn:cambridge.org:id:article:S0317167119000052/resource/name/S0317167119000052supp001.pdf)
Supplement: Supplementary file 1 [file S0317167119000052supp001.pdf]

Thank you for participating in our survey!

**Dear colleagues,**

**Through the use of this survey, we hope to collect your feedback on how you perceive the use of psychosurgery (i.e., anterior cingulotomy, anterior capsulotomy) and neuromodulation (i.e., deep brain stimulation) to treat psychiatric conditions.**

**By completing this survey, you thereby consent to the anonymous use of your answers for research purposes. You are free to skip questions or to stop answering at any time. The questionnaire does not collect any identifying information and it will not be possible for the research team to determine who has completed the questionnaire.**

## Demographic Information

1. What is your age?

- 60 and up  30-39  
 50-59  20-29  
 40-49

2. What is your gender?

- Male  Female  
 Other (please specify)

3. Where did you complete your psychiatry residency training?

- Canada  Europe  
 United States  
 Other

4. What is your current professional status?

- Psychiatrist in an academic center  R4  
 Psychiatrist in a non academic center  R3  
 Fellow in psychiatry  R2  
 R6  R1  
 R5  I am a student or resident from another specialty

5. How many years of practice do you have as a certified psychiatrist?

- More than 20  6-10  
 16-20  1-5  
 11-15  I am a fellow, resident or student

6. What is your main area of interest?

- Anxiety Disorders
- Child Psychiatry
- Consultation-Liaison Psychiatry
- Eating Disorders
- Emergency Psychiatry
- Forensic or Legal Psychiatry
- General Adult Psychiatry
- Other (please specify)
- Geriatric Psychiatry
- Mood Disorders
- Neuropsychiatry
- Personality Disorders
- Psychotic Disorders
- Transcultural Social Psychiatry

## Attitudes and Perceptions

7. How many patients in your clinical practice meet ALL of the following criteria:

- Major depressive disorder (MDD), current episode severe and incapacitating, duration at least 1 year
- Failed to respond to 3 antidepressants from 3 different classes
- Failed to respond to an adjunctive medication (i.e., antipsychotic, mood stabilizer, psychostimulant, triiodothyronine, bupropion, mirtazapine)
- Failed to respond to 20 sessions of psychotherapy (i.e., either cognitive-behavior therapy, interpersonal therapy or behavioral activation)
- Failed either a trial of rTMS or ECT treatment?

0

4

1

5

2

6-10

3

More than 10

8. How many patients in your clinical practice meet ALL of the following criteria:

- Severe and incapacitating obsessive-compulsive disorder (OCD), duration at least 5 years
- Failed to respond to 3 antidepressants including an SSRI and clomipramine
- Failed to respond to an adjunctive medication (i.e., atypical antipsychotic, anticonvulsant or MAOI)
- Failed to respond to 20 sessions of psychotherapy (i.e., cognitive-behavior therapy with exposure and response prevention)

0

4

1

5

2

6-10

3

More than 10

9. If your patient would suffer from a severe, resistant and incapacitating **MDD**, how likely would you be to refer him for **deep brain stimulation**?

|  | 1- I would strongly discourage this type of intervention | 2- I would discourage this type of intervention | 3- I would neither encourage nor discourage this type of intervention | 4- I would encourage this type of intervention | 5- I would strongly encourage this type of intervention |
|--|----------------------------------------------------------|-------------------------------------------------|-----------------------------------------------------------------------|------------------------------------------------|---------------------------------------------------------|
|--|----------------------------------------------------------|-------------------------------------------------|-----------------------------------------------------------------------|------------------------------------------------|---------------------------------------------------------|

Likelihood of referral for psychosurgery/neurostimulation

10. If your patient would suffer from a severe, resistant and incapacitating **MDD**, how likely would you be to refer him for **anterior cingulotomy**?

|                                                          |                                                 |                                                                       |                                                |                                                         |
|----------------------------------------------------------|-------------------------------------------------|-----------------------------------------------------------------------|------------------------------------------------|---------------------------------------------------------|
| 1- I would strongly discourage this type of intervention | 2- I would discourage this type of intervention | 3- I would neither encourage nor discourage this type of intervention | 4- I would encourage this type of intervention | 5- I would strongly encourage this type of intervention |
|----------------------------------------------------------|-------------------------------------------------|-----------------------------------------------------------------------|------------------------------------------------|---------------------------------------------------------|

Likelihood of referral for psychosurgery/neurostimulation

11. If your patient would suffer from a severe, resistant and incapacitating **OCD**, how likely would you be to refer him for **deep brain stimulation**?

|                                                          |                                                 |                                                                       |                                                |                                                         |
|----------------------------------------------------------|-------------------------------------------------|-----------------------------------------------------------------------|------------------------------------------------|---------------------------------------------------------|
| 1- I would strongly discourage this type of intervention | 2- I would discourage this type of intervention | 3- I would neither encourage nor discourage this type of intervention | 4- I would encourage this type of intervention | 5- I would strongly encourage this type of intervention |
|----------------------------------------------------------|-------------------------------------------------|-----------------------------------------------------------------------|------------------------------------------------|---------------------------------------------------------|

Likelihood of referral for psychosurgery/neurostimulation

12. If your patient would suffer from a severe, resistant and incapacitating **OCD**, how likely would you be to refer him for **anterior capsulotomy** or **anterior cingulotomy**?

|                                                          |                                                 |                                                                       |                                                |                                                         |
|----------------------------------------------------------|-------------------------------------------------|-----------------------------------------------------------------------|------------------------------------------------|---------------------------------------------------------|
| 1- I would strongly discourage this type of intervention | 2- I would discourage this type of intervention | 3- I would neither encourage nor discourage this type of intervention | 4- I would encourage this type of intervention | 5- I would strongly encourage this type of intervention |
|----------------------------------------------------------|-------------------------------------------------|-----------------------------------------------------------------------|------------------------------------------------|---------------------------------------------------------|

Likelihood of referral for psychosurgery/neurostimulation

## Attitudes and Perceptions

### How strongly do you agree or disagree with the following statements:

13. Psychosurgery can be effective for certain indications.

|                    | 1-Strongly disagree   | 2-Disagree            | 3-Neutral             | 4-Agree               | 5-Strongly agree      |
|--------------------|-----------------------|-----------------------|-----------------------|-----------------------|-----------------------|
| Level of agreement | <input type="radio"/> |

14. Psychosurgery is an investigational procedure.

|                    | 1-Strongly disagree   | 2-Disagree            | 3-Neutral             | 4-Agree               | 5-Strongly agree      |
|--------------------|-----------------------|-----------------------|-----------------------|-----------------------|-----------------------|
| Level of agreement | <input type="radio"/> |

15. Psychosurgery is dangerous.

|                    | 1-Strongly disagree   | 2-Disagree            | 3-Neutral             | 4-Agree               | 5-Strongly agree      |
|--------------------|-----------------------|-----------------------|-----------------------|-----------------------|-----------------------|
| Level of agreement | <input type="radio"/> |

16. Psychosurgery is unacceptable from an ethical perspective.

|                    | 1-Strongly disagree   | 2-Disagree            | 3-Neutral             | 4-Agree               | 5-Strongly agree      |
|--------------------|-----------------------|-----------------------|-----------------------|-----------------------|-----------------------|
| Level of agreement | <input type="radio"/> |

17. Psychosurgery still presents significant risks of abuse.

|                    | 1-Strongly disagree   | 2-Disagree            | 3-Neutral             | 4-Agree               | 5-Strongly agree      |
|--------------------|-----------------------|-----------------------|-----------------------|-----------------------|-----------------------|
| Level of agreement | <input type="radio"/> |

## Barriers to Referral

18. What are some of the barriers that you might encounter when referring a patient for psychosurgery?

You can select more than one answer.

- |                                                                                                                                |                                                                                                                                    |
|--------------------------------------------------------------------------------------------------------------------------------|------------------------------------------------------------------------------------------------------------------------------------|
| <input type="checkbox"/> Lack of knowledge regarding how the psychosurgeries are performed (techniques, anatomical targets...) | <input type="checkbox"/> Fear of irreversible complications                                                                        |
| <input type="checkbox"/> Lack of knowledge regarding the eligibility criteria                                                  | <input type="checkbox"/> Resistance from the part of the patient and/or family in regards to undergoing a psychosurgical procedure |
| <input type="checkbox"/> Lack of knowledge regarding the referral process                                                      | <input type="checkbox"/> I wouldn't know where to refer the patient                                                                |
| <input type="checkbox"/> Lack of knowledge regarding response and remissions rates                                             | <input type="checkbox"/> I didn't know that psychosurgery was still performed                                                      |
| <input type="checkbox"/> Lack of knowledge regarding possible side effects                                                     | <input type="checkbox"/> I don't feel comfortable discussing this with my patient                                                  |
| <input type="checkbox"/> Other (please specify)                                                                                |                                                                                                                                    |

## Referral Process

19. If you wanted to refer a patient for psychosurgery, how would you proceed?

Please choose an answer from the list below.

20. In your practice, how many patients have you referred for psychosurgery?

- 0  4  
 1  5  
 2  More than 5  
 3

21. For the patients that you have referred, how would you rate the efficacy of the procedures?

|                   | 1-Completely<br>Ineffective | 2                     | 3                     | 4                     | 5-<br>Completely Effective | I have never<br>referred a<br>patient for<br>psychosurgery |
|-------------------|-----------------------------|-----------------------|-----------------------|-----------------------|----------------------------|------------------------------------------------------------|
| Level of efficacy | <input type="radio"/>       | <input type="radio"/> | <input type="radio"/> | <input type="radio"/> | <input type="radio"/>      | <input type="radio"/>                                      |

Please elaborate on the benefits and/or complications



## Knowledge and Education

22. How would you rate your level of knowledge in regards to psychosurgery and neuromodulation?

|                    | 1-Poor                | 2-Weak                | 3-Adequate            | 4-Good                | 5-Excellent           |
|--------------------|-----------------------|-----------------------|-----------------------|-----------------------|-----------------------|
| Level of knowledge | <input type="radio"/> |

23. How would you rate your interest in learning about psychosurgery and neuromodulation during lectures or conferences?

|                   | 1-Not at all interested | 2-Mildly interested   | 3-Moderately Interested | 4-Very interested     | 5-Extremely interested |
|-------------------|-------------------------|-----------------------|-------------------------|-----------------------|------------------------|
| Level of interest | <input type="radio"/>   | <input type="radio"/> | <input type="radio"/>   | <input type="radio"/> | <input type="radio"/>  |

24. In your opinion, how important is it that residents learn about psychosurgery and neuromodulation (procedures, indications, response rates, side effects, etc.) during their residency training?

|                     | 1-Not at all important | 2-Mildly important    | 3-Moderately Important | 4-Very important      | 5-Extremely important |
|---------------------|------------------------|-----------------------|------------------------|-----------------------|-----------------------|
| Level of importance | <input type="radio"/>  | <input type="radio"/> | <input type="radio"/>  | <input type="radio"/> | <input type="radio"/> |

Thank you for your participation!

25. Do you have any other comments, questions, or concerns?
